# Supplementary material
Source: PubMed Central journal article supplement (PMC2488385)
Supplement: NIHMS58423-supplement-supplemental.pdf [file NIHMS58423-supplement-supplemental.pdf]

## Supplementary information for construction of plasmids

### Generation of PKL peptides

To generate the N-terminal fragment of PKL, the relevant portion of the *PKL* ORF was amplified with Platinum *Pfx* DNA polymerase (Invitrogen Corp., Carlsbad, CA) using the primers of JOPR488 (5'-GTCGGGATCCGATGAGTAGTTTGGTGGAGAG-3') and JOPR489 (5'-CCGCAAGCTTATGGATGTAACAAGCCTTTGA-3'). The PCR product was cloned into the *EcoRV* site of pBS II SK (Stratagene, La Jolla, CA) generating pJO844 and the identity of the product was confirmed by determination of the nucleotide sequence. The PKL N-terminal region was subsequently ligated as a *Bam*HI-*Hind*III fragment into the expression vector pET21b+ (Novagen, Madison, WI) cut with *Bam*HI and *Hind*III. This expression vector was designated pJO857.

An expression vector that carried the C-terminal region of PKL was generated as described above except that the primers used for amplification were JOPR490 (5'-GTCGGGATCCGGGATTCTTAAAGGCTTTCAA-3') and JOPR491 (5'-CCGCAAGCTTAATCAACGACCATGTTCTTTG-3'). The expression plasmid carrying the cloned C-terminal *PKL* fragment was designated pJO862.

### Production of full-length PKL in *E. coli* and yeast

*Cla*I and *Sph*I were added to 5' and 3' terminus of PKL cDNA by PCR and cloned into a modified version of pBluescript that contains an altered MCS generating pJO971. The sequence of the junction of the resulting PKL cDNA cassette at the start codon is 5'-TGGGTACCTTCGAAATCGATGAGTAGTTTGGTGGAGA-3' where PKL cDNA sequence is bolded and the *Cla*I site is underlined. The junction sequence at the stop codon is 5'-ATGGTCGTTGATTGAGCATGCCATGGCTAGC-3' where PKL cDNA sequence is bolded and the *Sph*I site is underlined. The final product has been validated by DNA sequencing.

To express PKL protein in *E. coli*, we first modified pET-21b (Novagen, San Diego, CA) to eliminate the T7 tag. A 5.4 kb *Nhe*I-*Eco*RI fragment of pET-21b+ was ligated to an adaptor formed by annealing the oligos 5'-AATTCGCTAGCGGAATCAAGGGA-3' and 5'-CTAGTCCCTTGATTCCGCTAGCG-3' to generate pJO1076. A 7.1 kb *Nhe*I-*Nde*I fragment from pJO971 carrying *PKL* cDNA was then ligated to a 5.4 kb *Nhe*I-*Nde*I fragment from pJO1076 to generate pJO1079, resulting in *PKL* cDNA being placed downstream of the T7 *lac* promoter.

To express PKL protein in yeast, we first modified pPC86 (Invitrogen Corp., Carlsbad, CA) to remove the GAL4 activation domain. A 6.7 kb *Hind*III-*Sal*I fragment of pPC86 (Invitrogen Corp., Carlsbad, CA) was ligated to an adaptor formed by annealing the oligos 5'-TCGACGCTAGCGTCCAAAGTCCATCGATA-3' and 5'-AGCTTATCGATGGACTTTGGACGCTAGCG-3' to generate pJO1080. A 7.1 kb *Nhe*I-*Cla*I fragment from pJO971 carrying *PKL* cDNA was then ligated to 6.7 kb *Nhe*I-*Cla*I fragment of pJO1080 to generate pJO1081, resulting in *PKL* cDNA being placed downstream of the *ADH* promoter.

### *PKL:eGFP* characterization

The transcriptional and translational *PKL:eGFP* fusions are both flanked by the genomic sequences that flank *PKL*: a 1.1 kb upstream fragment (bounded by a *Bst*BI site and the start codon of *PKL*) and a 1.4 kb downstream fragment (bounded by the stop codon of *PKL* and an *Nco*I site). For the *PKL:eGFP* transcriptional fusion, *Cla*I and *Sph*I restriction sites were introduced at the start and stop codon of both *PKL* and *eGFP* by PCR. *PKL* sequences were amplified from genomic DNA whereas the *eGFP* fragment was amplified from pEGAD (Cutler et al., 2000) All resulting PCR products (and those described hereafter) were subcloned into pBluescript and sequenced. The sequence of the junction of the resulting transcriptional fusion at the start codon is 5'-*tgtgtgcagaaaatcgatggtgagcaaggg*-3' where the *PKL* genomic sequence is italicized, the *eGFP*

sequence is bolded, the ATG is italicized and bolded, and the *ClaI* site is underlined. The sequence of the junction of the resulting transcriptional fusion at the stop codon is 5'-cgagctgtacaagtagcatgctcaactggt-3' where the *eGFP* sequence is bolded, the *PKL* genomic sequence is italicized, the termination codon is italicized and bolded, and the *SphI* site is underlined.

For the *PKL:eGFP* translational fusion, the *PKL* genomic sequence between the start and the stop codon was replaced with full-length *PKL* cDNA by PCR. *ClaI* and *SphI* sites were introduced by PCR prior to the termination codon of *PKL* such that it is possible to generate translational fusions with *ClaI-SphI* fragments. The resulting vector (containing 1.1 kb of *PKL* upstream sequence, *PKL* cDNA, *ClaI*, *SphI*, and 1.4 kb of *PKL* downstream sequence) is referred to as pJO981. A *ClaI* site and an (Ala)<sub>9</sub> linker were introduced at the ATG of *eGFP* and an *SphI* site was introduced at the 3' terminus by PCR. The *ClaI-SphI* fragment spanning the resulting *eGFP* product was then cloned into pJO981, generating pJO1027. The sequence of the resulting junction and the 3' end of the *PKL* ORF is 5'-ggtcgttgatcgcgat[gccgctgcggcagcggctgcggccgcttcg]atggtgagca-3' where the *PKL* cDNA sequence is italicized, the *eGFP* sequence is bolded, the (Ala)<sub>9</sub> linker sequence is bracketed, and the *ClaI* site is underlined. The sequence of the junction at the termination codon of the translational fusion is as described above for the transcriptional fusion.

#### *PKL:GR* inducible lines

*PKL:GR* is a C-terminal fusion of *PKL* with the ligand-binding domain of the rat glucocorticoid receptor (*GR*). Similar to the *PKL:eGFP* translational fusion described above, *PKL:GR* is derived from pJO981. A *ClaI* site and a small linker were introduced at the 5' terminus of the ligand-binding domain of *GR* and an *SphI* site was introduced at the 3' terminus by PCR amplification of pBI- $\Delta$ GR (Lloyd et al., 1994). The *ClaI-SphI* fragment spanning the resulting *GR* product was then cloned into pJO981, generating pJO1002. The sequence of the resulting junction and the 3' end of the *PKL* ORF is 5'-ggtcgttgatcgcgat[gctctagaggttct]gaagctcgaa-3' where the *PKL* cDNA sequence is italicized, the *GR* sequence is bolded, the linker sequence is bracketed, and the *ClaI* site is underlined. The sequence of the junction of the resulting transcriptional fusion at the stop codon is 5'-tcatcaaaaatgagcatgctcaactggt-3' where the *GR* sequence is bolded, the *PKL* genomic sequence is italicized, the termination codon is italicized and bolded, and the *SphI* site is underlined.

#### Supplementary information for qRT-PCR:

Oligonucleotide primer sequences and primer concentrations used for qRT-PCR are available in Table S2. Relative expression values of genes were calculated from critical threshold values as described in ABI User Bulletin #2, part # 4303859B available at <http://docs.appliedbiosystems.com/search.taf? UserReference=6E00E667F6CFB2C43DE24701>. Table S2 lists the critical threshold values for Table 1 from the manuscript.

**Table S1.** Relative transcript levels for Type I MADS-box transcription factors in *pkl* mutants. Transcript levels were determined for *pkl* and wild type plants at 50% radicle emergence (50% germination), in young seedlings (4-day-old seedlings) and in 21 day-old leaves (21-day-old rosette). 18s rRNA was used as a standardization control. Expression levels in *pkl* plants are normalized relative to wild-type plants. N/D indicates transcript not detected.

| AGI code  | 50% germination |              | 4-day-old seedlings |              | 21-day-old rosette |              |
|-----------|-----------------|--------------|---------------------|--------------|--------------------|--------------|
|           | WT              | <i>pkl-1</i> | WT                  | <i>pkl-1</i> | WT                 | <i>pkl-1</i> |
| At1g01530 | 1               | 2.20         | 1                   | 1.49         | 1                  | 2.04         |
| At1g17310 | 1               | 0.51         | 1                   | 0.69         | 1                  | 0.39         |
| At1g18750 | 1               | 0.08         | 1                   | 1.22         | 1                  | 0.73         |
| At1g22130 | 1               | 1.50         | 1                   | 4.43         | 1                  | 0.54         |
| At1g22590 | 1               | 0.52         | 1                   | 0.45         | 1                  | 0.22         |
| At1g28450 | N/D             | N/D          | 1                   | 4.35         | N/D                | N/D          |
| At1g28460 | 1               | 2.33         | 1                   | 1.19         | N/D                | N/D          |
| At1g31140 | N/D             | N/D          | 1                   | 1.02         | 1                  | 0.24         |
| At1g31630 | 1               | 0.78         | 1                   | 0.54         | N/D                | N/D          |
| At1g31640 | N/D             | N/D          | 1                   | 1.59         | 1                  | 1.09         |
| At1g47760 | 1               | 3.47         | 1                   | 2.21         | 1                  | 0.57         |
| At1g48150 | 1               | 0.57         | 1                   | 1.94         | 1                  | 0.72         |
| At1g60880 | 1               | 0.63         | 1                   | 0.38         | 1                  | 0.87         |
| At1g60920 | 1               | 2.83         | 1                   | 0.27         | N/D                | N/D          |
| At1g65300 | 1               | 1.81         | 1                   | 40.04        | 1                  | 21.41        |
| At1g65330 | 1               | 2.24         | 1                   | 161.27       | 1                  | 184.82       |
| At1g65360 | N/D             | N/D          | N/D                 | N/D          | 1                  | 0.83         |
| At1g69540 | 1               | 1.19         | 1                   | 0.99         | 1                  | 0.78         |
| At1g72350 | 1               | 0.60         | 1                   | 0.32         | N/D                | N/D          |
| At1g77950 | 1               | 0.88         | 1                   | 0.72         | N/D                | N/D          |
| At1g77980 | N/D             | N/D          | 1                   | 0.28         | N/D                | N/D          |
| At2g03060 | 1               | 1.25         | 1                   | 1.27         | 1                  | 1.30         |
| At2g24840 | N/D             | N/D          | 1                   | 2.27         | N/D                | N/D          |
| At2g26320 | N/D             | N/D          | 1                   | 0.86         | N/D                | N/D          |
| At2g26880 | 1               | 1.56         | N/D                 | N/D          | N/D                | N/D          |
| At2g28700 | N/D             | N/D          | 1                   | 17.15        | 1                  | 3.15         |
| At2g34440 | 1               | 1.44         | 1                   | 0.73         | 1                  | 2.09         |
| At2g40210 | 1               | 1.92         | 1                   | 1.85         | N/D                | N/D          |
| At3g04100 | N/D             | N/D          | N/D                 | N/D          | N/D                | N/D          |
| At3g05860 | 1               | 3.66         | 1                   | 3.34         | N/D                | N/D          |
| At3g66656 | 1               | 37.53        | 1                   | 1.28         | N/D                | N/D          |
| At4g14530 | N/D             | N/D          | 1                   | 0.93         | N/D                | N/D          |
| At4g36590 | N/D             | N/D          | N/D                 | N/D          | N/D                | N/D          |
| At5g04640 | N/D             | N/D          | 1                   | 0.92         | N/D                | N/D          |
| At5g06500 | N/D             | N/D          | N/D                 | N/D          | N/D                | N/D          |
| At5g26580 | 1               | 0.87         | 1                   | 0.99         | 1                  | 2.52         |
| At5g26630 | 1               | 5.08         | 1                   | 0.57         | 1                  | 0.74         |
| At5g26650 | 1               | 1.56         | N/D                 | N/D          | N/D                | N/D          |
| At5g26950 | 1               | 3.05         | 1                   | 0.92         | 1                  | 2.10         |
| At5g27130 | N/D             | N/D          | 1                   | 1.63         | 1                  | 0.19         |
| At5g27960 | N/D             | N/D          | N/D                 | N/D          | N/D                | N/D          |
| At5g38620 | N/D             | N/D          | N/D                 | N/D          | N/D                | N/D          |
| At5g48670 | 1               | 1.64         | 1                   | 1.01         | 1                  | 0.23         |
| At5g49420 | 1               | 2.08         | N/D                 | N/D          | 1                  | 0.19         |
| At5g49490 | N/D             | N/D          | 1                   | 2.13         | N/D                | N/D          |
| At5g55690 | N/D             | N/D          | 1                   | 3.30         | N/D                | N/D          |
| At5g58890 | N/D             | N/D          | 1                   | 0.82         | N/D                | N/D          |
| At5g60440 | 1               | 0.28         | 1                   | 0.35         | 1                  | 0.41         |
| At5g38620 | N/D             | N/D          | N/D                 | N/D          | N/D                | N/D          |
| At5g48670 | 1               | 1.64         | 1                   | 1.01         | 1                  | 0.23         |
| At5g49420 | 1               | 2.08         | N/D                 | N/D          | 1                  | 0.19         |
| At5g49490 | N/D             | N/D          | 1                   | 2.13         | N/D                | N/D          |
| At5g55690 | N/D             | N/D          | 1                   | 3.30         | N/D                | N/D          |
| At5g58890 | N/D             | N/D          | 1                   | 0.82         | N/D                | N/D          |
| At5g60440 | 1               | 0.28         | 1                   | 0.35         | 1                  | 0.41         |

**Table S2.** Primer information for qRT-PCR.

| Gene name | AGI code  | Oligonucleotide Primer Sequences |                            | primer number (JOPR####) |         | Concentrations used (nM) |         |
|-----------|-----------|----------------------------------|----------------------------|--------------------------|---------|--------------------------|---------|
|           |           | Forward primer sequence          | Reverse primer sequence    | Forward                  | Reverse | Forward                  | Reverse |
|           | At1g01530 | TGATCAAAACGGAACTCTACTTCTG        | GCTGGTGTGCGATTCCATAACA     | 2595                     | 2596    | 900                      | 900     |
|           | At1g17310 | GGTAACGATCGGACGGTTGA             | GGTTTCCATCCCATCACATTG      | 2597                     | 2598    | 900                      | 900     |
|           | At1g18750 | AACTCTTGCCAATAGAATGTGCAA         | TTACCTCCCATCGCCATAGG       | 2599                     | 2600    | 900                      | 900     |
|           | At1g22130 | TGCCAGCTCAGCAGAGTGATA            | GTCGGAGACTTCATGATCAACTTG   | 3127                     | 3128    | 900                      | 900     |
|           | At1g22590 | CGGTCAGAGTGGCTTGCA               | TTCTCTACCGAAAGTTTCGTTAA    | 2603                     | 2604    | 900                      | 900     |
|           | At1g28450 | TCAAGAAAATTGAAAAAGCAAGAC         | AGAGAATGGAAAGCTCAATGATCA   | 3129                     | 3130    | 900                      | 900     |
|           | At1g28460 | ACACTTTTGGCAGTCCATCCTT           | AGGCATCGCCGTTGAGAA         | 2607                     | 2608    | 900                      | 900     |
|           | At1g31140 | CGATGTCCACCTTGGTCTCA             | TGCTGGTAGAGTTGGAGCAGAA     | 2609                     | 2610    | 900                      | 900     |
|           | At1g31630 | CAGTGGTGTGGCCGTCAA               | CCGGCCTCTCCATAAACATG       | 2611                     | 2612    | 900                      | 900     |
|           | At1g31640 | ACAGTCCGTTTCGAGAATCCAA           | GAATCCGAAATCACCTCTTGAA     | 2613                     | 2614    | 900                      | 900     |
|           | At1g47760 | CGAAAGGAAAGCGACGTTTT             | CGCGAGTTCATCAGCCTTCT       | 2615                     | 2616    | 900                      | 900     |
|           | At1g48150 | TTGAAATTGAGAAACGCATGACTAAA       | AGTGTGGGACGGCGTTTG         | 3131                     | 3132    | 900                      | 900     |
|           | At1g60880 | GCAATCTTAGCGGCTCCTATGA           | CGACAGAGGAATGACCGAAAG      | 2619                     | 2620    | 900                      | 900     |
|           | At1g60920 | GGCAGTCGATGCGGTTTT               | TGCTCTTCACGGCATCATCTA      | 2621                     | 2622    | 900                      | 900     |
| PHE2      | At1g65300 | GATGACGAAGAACTAACCAGGCTA         | GGGATCGAGTTGAAACGGACTATAG  | 3133                     | 3134    | 50                       | 300     |
| PHE1      | At1g65330 | CATCTGTCCCAATCGGTTTTG            | TGGAATTGAACCGGCTCTTG       | 2623                     | 2624    | 900                      | 900     |
|           | At1g65360 | TTCAAATGCTCAACAAATCCTACAC        | CGCCGCGACTGCTTATTC         | 3135                     | 3136    | 900                      | 900     |
|           | At1g69540 | GGGAAAGGCTTCAATTTGCA             | GGAGAGAGTTGAGCAAACCTTAGCA  | 2629                     | 2630    | 900                      | 900     |
|           | At1g72350 | CCCGAAGGCAAGTGACGTT              | CTTAATTCTGCCGCTTTTTTGAA    | 2631                     | 2632    | 900                      | 900     |
|           | At1g77950 | TCTTTTCCGGTCAAACAAGGA            | CTCTTTCTTGATCAGGAAGATTGATG | 2633                     | 2634    | 900                      | 900     |
|           | At1g77980 | TGGGTGGGCCTTTTGGA                | CTTCGTTAGGCCCATTTTCAGT     | 2635                     | 2636    | 900                      | 900     |
|           | At2g03060 | GTCGAGTGCTCAGCGAGTTCT            | TCAGGAGATTTCCCTGTTCCA      | 2637                     | 2638    | 900                      | 900     |
|           | At2g24840 | TCGCTACGTGTCTCGAAACAA            | TGCAGGGCTTCCTTGCA          | 2639                     | 2640    | 900                      | 900     |
|           | At2g26320 | CCCACCGAGAAGCCTACAGTT            | GCATGCAAAACCTCTCAAGGA      | 2641                     | 2642    | 900                      | 900     |
|           | At2g26880 | AAGAAGTTTGATTTTCATGCAGCAT        | CGACTTGCACCTCGAATGG        | 2643                     | 2644    | 300                      | 300     |
|           | At2g28700 | CTGGAAACATGGCAACAACCTGTA         | AGGAGGAACTCCCTTCAGCAA      | 2645                     | 2646    | 900                      | 900     |
|           | At2g34440 | GGACATGAACACACGACAGGTT           | AACTCGCTCGCCTTTGAA         | 2647                     | 2648    | 900                      | 900     |
|           | At2g40210 | CCCCGATAAGGTTGGACCAT             | CGAAAAATTCGTCTAGGAGACCAT   | 2649                     | 2650    | 300                      | 900     |
|           | At3g04100 | CAGACCCCTCGTCAAGCT               | TCGAGCGCCTCCATTTTTT        | 2651                     | 2652    | 900                      | 900     |
|           | At3g05860 | CGTTCTCTGCGGAATCGAA              | GCCAGACTTCAGGGTTTGAGTT     | 2653                     | 2654    | 900                      | 900     |
|           | At3g66656 | GAGCGAGCTTGGCACTCTGT             | CGGTTTGTTCCTGGAGAAAAG      | 2655                     | 2656    | 300                      | 300     |
|           | At4g14530 | TCGGAGGATTCGGAGGAGTT             | CCAATTCCTCAGATCTCTCAACA    | 2657                     | 2658    | 300                      | 300     |
|           | At4g36590 | CACATTAAGTGGTGAGAGATTCTG         | TGGATGGCCAAAAGAAAACAC      | 2659                     | 2660    | 900                      | 900     |
|           | At5g04640 | TCTCTCCGATGCACAAATTGC            | GCCAAAGGTGTAGAAAGAAACGTT   | 2661                     | 2662    | 900                      | 900     |
|           | At5g06500 | GCCCTGAGGGCTTCGAAT               | CTTCCAGTTTCCATCATGTTTAACC  | 2663                     | 2664    | 900                      | 900     |
|           | At5g26580 | TGGCCGATACGACTCATTTC             | AGCCTGGTATTGAACCTGATTCA    | 2665                     | 2666    | 900                      | 900     |
|           | At5g26630 | TGTCGTCAACAGTCCGTACGA            | CCTGGTTCGACGCTCTCT         | 2667                     | 2668    | 900                      | 900     |
|           | At5g26650 | TGAATCCGATGGTGGAAACAA            | TAGCAGTTTCCGTCCACGAAA      | 2669                     | 2670    | 900                      | 900     |
|           | At5g26950 | TTTTCTCCTCAGATGCAGACA            | GATTCCATGGCGAAACTG         | 2671                     | 2672    | 900                      | 900     |
|           | At5g27130 | AGAGCAACGAGCCGTGACTT             | GAGATCGGCGGCTTTGG          | 2673                     | 2674    | 300                      | 900     |
|           | At5g27960 | TTCTTGCGGGCGATATGAC              | CTGGGAGCAGTTACCGCATT       | 2675                     | 2676    | 900                      | 900     |
|           | At5g38620 | TGTTACGGAACCTCAAGATCAAA          | GATTTTCAGGGATGCAACAACT     | 2677                     | 2678    | 300                      | 300     |
|           | At5g48670 | CCAACATCAGATCCATGACGAA           | CAGGGATGATGCTGCTTGAGT      | 2679                     | 2680    | 900                      | 900     |
|           | At5g49420 | GACGAGGGAGGACGTTGGTA             | CGTCGTTCCACCAAAAACCT       | 2681                     | 2682    | 900                      | 900     |
|           | At5g49490 | CGAGATTGAGAGATTATGGCTTTCA        | CCACAGCGACGGTTTTTGT        | 2683                     | 2684    | 900                      | 900     |
|           | At5g55690 | CCTCAAATACTGCGGAAGTGTCT          | AGCTTTGCCGTTTCGCTAT        | 2685                     | 2686    | 900                      | 900     |
|           | At5g58890 | AAACCAACGTGGAGACTTTCGT           | TCACGCTTCACTCTTTTTAGTCA    | 2687                     | 2688    | 900                      | 900     |
|           | At5g60440 | GACAAAAGCCCTTGGGAATTG            | AACCCCTCGAGTTGAGATAACG     | 2689                     | 2690    | 900                      | 900     |
| 18S       |           | GGTCTGTGATGCCCTTAGATGTT          | GGCAAGGTGTGAACTCGTTGA      | 997                      | 998     | 300                      | 900     |
| LEC1      | At1g21970 | AAGCCGGCATTCCGTTAAT              | GGTCGTCGGGTCAAGATGAA       | 868                      | 869     | 300                      | 50      |

**Table S3.** Critical threshold values for Tables 1, 2, and S1. “AGI Code” provides the AGI number for the analyzed gene. ”Sample” describes the sample collected. Sample codes: W=wt, P=pkl, G=germination, S=4d seedling, R=21d rosette. “Average CT” is average critical threshold of three measurements, and “STDEV” is the standard deviation associated with the average critical threshold. 18S was used as a control. “GOI” indicates values for gene of interest (designated by AGI code in first column). N/D indicates not detected.

| AGI code  | Sample | 18S    |       | GOI    |       | Sample | 18S    |       | GOI    |       |
|-----------|--------|--------|-------|--------|-------|--------|--------|-------|--------|-------|
|           |        | Avg CT | STDEV | Avg CT | STDEV |        | Avg CT | STDEV | Avg CT | STDEV |
| At1g01530 | WG1    | 7.18   | 0.27  | 35.02  | 0.08  | PG1    | 7.82   | 0.32  | 34.52  | 0.41  |
| At1g17310 | WG2    | 6.83   | 0.12  | 33.65  | 0.20  | PG2    | 6.91   | 0.09  | 34.70  | 0.46  |
| At1g18750 | WG3    | 9.24   | 0.05  | 31.35  | 0.58  | PG3    | 9.29   | 0.05  | 34.97  | 0.62  |
| At1g22130 | WG4    | 8.15   | 0.05  | 37.61  | 0.32  | PG4    | 8.21   | 0.05  | 37.08  | 0.33  |
| At1g22590 | WG5    | 7.36   | 0.07  | 28.16  | 0.07  | PG5    | 7.43   | 0.06  | 29.15  | 0.12  |
| At1g28450 | WG6    | 6.38   | 0.08  | 34.92  | N/D   | PG6    | 6.45   | 0.08  | 34.14  | N/D   |
| At1g28460 | WG7    | 7.36   | 0.07  | 37.95  | 0.21  | PG7    | 7.43   | 0.06  | 36.79  | 0.91  |
| At1g31140 | WG8    | 6.82   | 0.16  | 35.60  | N/D   | PG8    | 6.98   | 0.16  | 38.81  | N/D   |
| At1g31630 | WG9    | 6.82   | 0.16  | 35.52  | N/D   | PG9    | 6.98   | 0.16  | 36.03  | N/D   |
| At1g31640 | WG10   | 7.18   | 0.08  | N/D    | N/D   | PG10   | 6.85   | 0.01  | N/D    | N/D   |
| At1g47760 | WG11   | 7.68   | 0.10  | 26.81  | 0.14  | PG11   | 7.90   | 0.16  | 25.23  | 0.26  |
| At1g48150 | WG12   | 7.68   | 0.10  | 33.70  | 0.48  | PG12   | 7.90   | 0.16  | 34.73  | 0.57  |
| At1g60880 | WG13   | 6.82   | 0.16  | 34.02  | 0.01  | PG13   | 6.98   | 0.16  | 34.84  | 1.01  |
| At1g60920 | WG14   | 7.30   | 0.09  | 35.84  | 0.65  | PG14   | 7.46   | 0.15  | 34.50  | 0.62  |
| At1g65300 | WG15   | 7.50   | 0.17  | 37.09  | N/D   | PG15   | 8.06   | 0.06  | 36.80  | 0.12  |
| At1g65330 | WG16   | 7.18   | 0.08  | 36.09  | 0.40  | PG16   | 6.85   | 0.01  | 34.60  | 0.56  |
| At1g65360 | WG17   | 6.24   | 0.16  | 39.65  | N/D   | PG17   | 6.40   | 0.12  | 38.39  | N/D   |
| At1g69540 | WG18   | 7.97   | 0.16  | 32.89  | 0.36  | PG18   | 8.14   | 0.04  | 32.80  | 0.14  |
| At1g72350 | WG19   | 7.97   | 0.16  | 37.73  | 2.18  | PG19   | 8.14   | 0.04  | 38.64  | 1.41  |
| At1g77950 | WG20   | 6.59   | 0.17  | 28.80  | 0.15  | PG20   | 6.80   | 0.13  | 29.20  | 0.15  |
| At1g77980 | WG21   | 6.59   | 0.17  | N/D    | N/D   | PG21   | 6.80   | 0.13  | 36.58  | 1.19  |
| At2g03060 | WG22   | 8.19   | 0.08  | 27.52  | 0.08  | PG22   | 8.25   | 0.10  | 27.25  | 0.13  |
| At2g24840 | WG23   | 8.19   | 0.08  | N/D    | N/D   | PG23   | 8.25   | 0.10  | 38.12  | 0.10  |
| At2g26320 | WG24   | 8.19   | 0.08  | 38.92  | N/D   | PG24   | 8.25   | 0.10  | N/D    | N/D   |
| At2g26880 | WG25   | 8.26   | 0.11  | 35.79  | 0.67  | PG25   | 8.78   | 0.41  | 35.66  | 0.00  |
| At2g28700 | WG26   | 8.17   | 0.08  | N/D    | N/D   | PG26   | 8.58   | 0.54  | 37.85  | N/D   |
| At2g34440 | WG27   | 7.66   | 0.02  | 33.44  | 0.30  | PG27   | 7.98   | 0.21  | 33.24  | 0.51  |
| At2g40210 | WG28   | 7.18   | 0.27  | 36.02  | 0.37  | PG28   | 7.82   | 0.32  | 35.72  | 0.43  |
| At3g04100 | WG29   | 7.43   | 0.46  | N/D    | N/D   | PG29   | 8.19   | 0.20  | 38.13  | N/D   |
| At3g05860 | WG30   | 6.66   | 0.08  | 34.20  | 0.45  | PG30   | 7.05   | 0.17  | 32.73  | 0.62  |
| At3g66656 | WG31   | 7.66   | 0.02  | 38.34  | 1.00  | PG31   | 7.98   | 0.21  | 33.44  | 0.50  |
| At4g14530 | WG32   | 7.50   | 0.17  | 35.66  | 0.22  | PG32   | 8.06   | 0.06  | 36.00  | N/D   |
| At4g36590 | WG33   | 9.17   | 0.07  | 36.84  | 0.60  | PG33   | 9.47   | 0.13  | 37.52  | N/D   |
| At5g04640 | WG34   | 7.43   | 0.46  | 35.87  | 0.26  | PG34   | 8.19   | 0.20  | 36.76  | N/D   |
| At5g06500 | WG35   | 7.84   | 0.16  | 38.24  | 1.44  | PG35   | 8.34   | 0.37  | 36.04  | 0.14  |
| At5g26580 | WG36   | 7.05   | 0.40  | 37.48  | 0.43  | PG36   | 7.22   | 0.71  | 37.86  | 1.19  |
| At5g26630 | WG37   | 6.15   | 0.13  | 37.39  | 1.40  | PG37   | 6.38   | 0.11  | 35.28  | 0.19  |
| At5g26650 | WG38   | 7.43   | 0.46  | 36.67  | 0.25  | PG38   | 8.19   | 0.20  | 36.79  | 0.79  |
| At5g26950 | WG39   | 6.71   | 0.18  | 34.81  | 0.41  | PG39   | 6.71   | 0.06  | 33.21  | 0.18  |
| At5g27130 | WG40   | 7.43   | 0.46  | 39.47  | N/D   | PG40   | 8.19   | 0.20  | 36.14  | 0.47  |
| At5g27960 | WG41   | 6.71   | 0.18  | 35.44  | 0.25  | PG41   | 6.71   | 0.06  | 35.48  | N/D   |
| At5g38620 | WG42   | 6.71   | 0.18  | 36.59  | N/D   | PG42   | 6.71   | 0.06  | 35.94  | N/D   |
| At5g48670 | WG43   | 6.71   | 0.18  | 32.76  | 0.26  | PG43   | 6.71   | 0.06  | 32.06  | 0.35  |
| At5g49420 | WG44   | 7.67   | 0.43  | 36.85  | 1.03  | PG44   | 7.77   | 0.75  | 35.89  | 0.64  |
| At5g49490 | WG45   | 7.67   | 0.43  | 35.99  | 0.22  | PG45   | 7.77   | 0.75  | N/D    | N/D   |
| At5g55690 | WG46   | 6.48   | 0.12  | 34.80  | 0.33  | PG46   | 6.86   | 0.21  | 35.04  | N/D   |
| At5g58890 | WG47   | 7.56   | 0.06  | 35.98  | N/D   | PG47   | 7.93   | 0.28  | 36.51  | 0.87  |
| At5g60440 | WG48   | 7.43   | 0.14  | 34.07  | 0.15  | PG48   | 7.86   | 0.20  | 36.34  | 0.92  |

**Table S3. (Cont'd)**

| AGI<br>code | Sample | 18S    |       | GOI    |       | Sample | 18S    |       | GOI    |       |
|-------------|--------|--------|-------|--------|-------|--------|--------|-------|--------|-------|
|             |        | Avg CT | STDEV | Avg CT | STDEV |        | Avg CT | STDEV | Avg CT | STDEV |
| At1g01530   | WS1    | 7.23   | 0.07  | 32.86  | 0.10  | PS1    | 7.36   | 0.07  | 32.41  | 0.36  |
| At1g17310   | WS2    | 6.44   | 0.08  | 30.99  | 0.25  | PS2    | 7.21   | 0.07  | 32.30  | 0.05  |
| At1g18750   | WS3    | 9.60   | 0.10  | 31.81  | 0.28  | PS3    | 9.70   | 0.10  | 31.63  | 0.23  |
| At1g22130   | WS4    | 7.39   | 0.21  | 37.12  | 0.28  | PS4    | 8.01   | 0.07  | 35.59  | 0.16  |
| At1g22590   | WS5    | 6.44   | 0.08  | 24.15  | 0.01  | PS5    | 7.21   | 0.07  | 26.07  | 0.11  |
| At1g28450   | WS6    | 7.59   | 0.14  | 36.58  | 0.17  | PS6    | 7.74   | 0.18  | 34.60  | 0.11  |
| At1g28460   | WS7    | 6.44   | 0.08  | 36.16  | 0.93  | PS7    | 7.21   | 0.07  | 36.69  | 0.14  |
| At1g31140   | WS8    | 7.33   | 0.11  | 33.86  | 0.62  | PS8    | 7.69   | 0.22  | 34.19  | 0.54  |
| At1g31630   | WS9    | 6.44   | 0.08  | 32.84  | 0.54  | PS9    | 7.21   | 0.07  | 34.51  | 0.76  |
| At1g31640   | WS10   | 7.39   | 0.21  | 35.84  | 0.64  | PS10   | 8.01   | 0.07  | 35.80  | 0.74  |
| At1g47760   | WS11   | 6.44   | 0.08  | 25.34  | 0.03  | PS11   | 7.21   | 0.07  | 24.97  | 0.04  |
| At1g48150   | WS12   | 7.33   | 0.11  | 33.47  | 0.79  | PS12   | 7.69   | 0.22  | 32.87  | 0.42  |
| At1g60880   | WS13   | 7.33   | 0.11  | 34.25  | 0.33  | PS13   | 7.69   | 0.22  | 36.00  | 0.07  |
| At1g60920   | WS14   | 6.44   | 0.08  | 32.90  | 0.38  | PS14   | 7.21   | 0.07  | 35.57  | 0.25  |
| At1g65300   | WS15   | 7.39   | 0.21  | 35.60  | 0.59  | PS15   | 8.01   | 0.07  | 30.90  | 0.34  |
| At1g65330   | WS16   | 6.49   | 0.12  | 31.41  | 0.14  | PS16   | 6.69   | 0.36  | 24.27  | 0.02  |
| At1g65360   | WS17   | 6.49   | 0.12  | 35.27  | 0.08  | PS17   | 6.69   | 0.36  | 34.48  | N/D   |
| At1g69540   | WS18   | 6.49   | 0.12  | 31.74  | 0.16  | PS18   | 6.69   | 0.36  | 31.94  | 0.62  |
| At1g72350   | WS19   | 7.58   | 0.06  | 34.93  | 0.40  | PS19   | 7.68   | 0.42  | 36.65  | 0.87  |
| At1g77950   | WS20   | 7.03   | 0.03  | 30.38  | 0.09  | PS20   | 7.75   | 0.07  | 31.58  | 0.16  |
| At1g77980   | WS21   | 6.44   | 0.08  | 35.30  | 0.33  | PS21   | 7.21   | 0.07  | 37.89  | 0.47  |
| At2g03060   | WS22   | 6.54   | 0.09  | 25.46  | 0.07  | PS22   | 6.71   | 0.08  | 25.29  | 0.04  |
| At2g24840   | WS23   | 6.13   | 0.09  | 36.72  | 1.52  | PS23   | 6.87   | 0.14  | 36.28  | 1.03  |
| At2g26320   | WS24   | 5.61   | 0.19  | 36.03  | 0.27  | PS24   | 6.33   | 0.19  | 36.97  | 0.08  |
| At2g26880   | WS25   | 7.59   | 0.05  | N/D    | N/D   | PS25   | 7.85   | 0.23  | N/D    | N/D   |
| At2g28700   | WS26   | 6.54   | 0.09  | 34.47  | 1.05  | PS26   | 6.71   | 0.08  | 30.54  | 0.07  |
| At2g34440   | WS27   | 8.09   | 0.03  | 32.43  | 0.36  | PS27   | 8.09   | 0.41  | 32.88  | 0.24  |
| At2g40210   | WS28   | 7.59   | 0.05  | 37.67  | 0.76  | PS28   | 7.85   | 0.23  | 37.05  | 0.04  |
| At3g04100   | WS29   | 6.45   | 0.01  | 39.57  | 0.03  | PS29   | 7.21   | 0.07  | 36.73  | N/D   |
| At3g05860   | WS30   | 6.44   | 0.22  | 29.61  | 0.27  | PS30   | 6.79   | 0.41  | 28.23  | 0.26  |
| At3g66656   | WS31   | 7.59   | 0.05  | 33.57  | 0.31  | PS31   | 7.85   | 0.23  | 33.48  | 0.22  |
| At4g14530   | WS32   | 7.18   | 0.12  | 35.16  | 0.14  | PS32   | 7.41   | 0.11  | 35.49  | 2.21  |
| At4g36590   | WS33   | 7.06   | 0.02  | 33.89  | 0.66  | PS33   | 7.72   | 0.01  | 38.52  | 0.47  |
| At5g04640   | WS34   | 6.44   | 0.22  | 38.80  | 0.28  | PS34   | 6.79   | 0.41  | 39.27  | 0.54  |
| At5g06500   | WS35   | 6.44   | 0.22  | 37.24  | N/D   | PS35   | 6.79   | 0.41  | 34.81  | 0.47  |
| At5g26580   | WS36   | 7.02   | 0.06  | 36.61  | 0.29  | PS36   | 7.37   | 0.12  | 36.98  | 0.26  |
| At5g26630   | WS37   | 7.02   | 0.06  | 32.91  | 0.48  | PS37   | 7.37   | 0.12  | 34.07  | 0.69  |
| At5g26650   | WS38   | 7.02   | 0.06  | N/D    | N/D   | PS38   | 7.37   | 0.12  | N/D    | N/D   |
| At5g26950   | WS39   | 6.45   | 0.01  | 33.68  | 0.55  | PS39   | 7.18   | 0.03  | 34.52  | 0.38  |
| At5g27130   | WS40   | 8.08   | 0.01  | 33.97  | 0.24  | PS40   | 8.77   | 0.01  | 33.95  | 0.60  |
| At5g27960   | WS41   | 7.02   | 0.06  | 35.44  | N/D   | PS41   | 7.37   | 0.12  | 35.80  | N/D   |
| At5g38620   | WS42   | 7.02   | 0.06  | 37.27  | N/D   | PS42   | 7.37   | 0.12  | N/D    | N/D   |
| At5g48670   | WS43   | 6.45   | 0.01  | 30.02  | 0.15  | PS43   | 7.18   | 0.03  | 30.73  | 0.31  |
| At5g49420   | WS44   | 7.02   | 0.06  | 34.06  | 0.23  | PS44   | 7.37   | 0.12  | 36.76  | 2.26  |
| At5g49490   | WS45   | 6.45   | 0.01  | 36.71  | 0.98  | PS45   | 7.18   | 0.03  | 36.35  | 0.49  |
| At5g55690   | WS46   | 7.39   | 0.21  | 36.86  | 0.99  | PS46   | 8.01   | 0.07  | 35.76  | 0.42  |
| At5g58890   | WS47   | 5.49   | 0.04  | 33.86  | 0.45  | PS47   | 6.29   | 0.09  | 34.95  | 0.25  |
| At5g60440   | WS48   | 6.45   | 0.01  | 30.98  | 0.23  | PS48   | 7.18   | 0.03  | 33.23  | 0.11  |

**Table S3. (Cont'd)**

| AGI<br>code | 18S    |        |       |        |       | GOI    |        |       |        |       |
|-------------|--------|--------|-------|--------|-------|--------|--------|-------|--------|-------|
|             | Sample | Avg CT | STDEV | Avg CT | STDEV | Sample | Avg CT | STDEV | Avg CT | STDEV |
| At1g01530   | WR1    | 7.25   | 0.20  | 30.51  | 0.24  | PR1    | 7.38   | 0.22  | 29.61  | 0.14  |
| At1g17310   | WR2    | 7.25   | 0.20  | 34.08  | 0.01  | PR2    | 7.38   | 0.22  | 35.58  | 0.14  |
| At1g18750   | WR3    | 7.25   | 0.20  | 14.28  | 0.13  | PR3    | 7.38   | 0.22  | 14.86  | 1.79  |
| At1g22130   | WR4    | 7.25   | 0.20  | 33.96  | 0.31  | PR4    | 7.38   | 0.22  | 34.98  | 0.46  |
| At1g22590   | WR5    | 7.25   | 0.20  | 26.09  | 0.24  | PR5    | 7.38   | 0.22  | 28.37  | 0.11  |
| At1g28450   | WR6    | 7.25   | 0.20  | 35.09  | 0.01  | PR6    | 7.38   | 0.22  | 34.98  | N/D   |
| At1g28460   | WR7    | 7.04   | 0.21  | 37.21  | 3.71  | PR7    | 7.29   | 0.20  | 34.56  | N/D   |
| At1g31140   | WR8    | 7.04   | 0.21  | 34.80  | 0.73  | PR8    | 7.29   | 0.20  | 37.09  | 2.60  |
| At1g31630   | WR9    | 7.04   | 0.21  | 36.48  | N/D   | PR9    | 7.29   | 0.20  | 38.48  | N/D   |
| At1g31640   | WR10   | 7.04   | 0.21  | 37.54  | 1.59  | PR10   | 7.29   | 0.20  | 37.66  | 0.99  |
| At1g47760   | WR11   | 7.04   | 0.21  | 28.36  | 0.43  | PR11   | 7.29   | 0.20  | 29.42  | 0.11  |
| At1g48150   | WR12   | 7.04   | 0.21  | 32.00  | 0.45  | PR12   | 7.29   | 0.20  | 32.72  | 0.27  |
| At1g60880   | WR13   | 7.04   | 0.21  | 36.56  | 1.54  | PR13   | 7.29   | 0.20  | 37.00  | 2.22  |
| At1g60920   | WR14   | 7.04   | 0.21  | 35.92  | 0.24  | PR14   | 7.29   | 0.20  | 39.03  | N/D   |
| At1g65300   | WR15   | 7.04   | 0.21  | 37.14  | 0.12  | PR15   | 7.29   | 0.20  | 32.97  | 0.21  |
| At1g65330   | WR16   | 7.04   | 0.21  | 29.78  | 0.15  | PR16   | 7.29   | 0.20  | 22.49  | 0.13  |
| At1g65360   | WR17   | 7.04   | 0.21  | 29.47  | 0.23  | PR17   | 7.29   | 0.20  | 29.98  | 0.11  |
| At1g69540   | WR18   | 7.04   | 0.21  | 31.97  | 0.57  | PR18   | 7.29   | 0.20  | 32.57  | 0.32  |
| At1g72350   | WR19   | 7.04   | 0.21  | 36.81  | 1.73  | PR19   | 7.29   | 0.20  | N/D    | N/D   |
| At1g77950   | WR20   | 7.04   | 0.21  | 35.42  | N/D   | PR20   | 7.29   | 0.20  | N/D    | N/D   |
| At1g77980   | WR21   | 7.04   | 0.21  | 35.16  | N/D   | PR21   | 7.29   | 0.20  | N/D    | N/D   |
| At2g03060   | WR22   | 6.82   | 0.43  | 26.90  | 0.46  | PR22   | 7.13   | 0.04  | 26.85  | 0.12  |
| At2g24840   | WR23   | 6.82   | 0.43  | 36.25  | N/D   | PR23   | 7.13   | 0.04  | 37.30  | 0.71  |
| At2g26320   | WR24   | 6.82   | 0.43  | N/D    | N/D   | PR24   | 7.13   | 0.04  | N/D    | N/D   |
| At2g26880   | WR25   | 8.61   | 0.43  | 36.97  | N/D   | PR25   | 8.96   | 0.07  | 37.74  | N/D   |
| At2g28700   | WR26   | 6.82   | 0.43  | 35.52  | 0.38  | PR26   | 7.13   | 0.04  | 34.18  | 0.35  |
| At2g34440   | WR27   | 6.82   | 0.43  | 32.21  | 0.37  | PR27   | 7.13   | 0.04  | 31.46  | 0.01  |
| At2g40210   | WR28   | 6.82   | 0.43  | 37.33  | N/D   | PR28   | 7.13   | 0.04  | 35.26  | N/D   |
| At3g04100   | WR29   | 6.82   | 0.43  | 35.06  | 0.86  | PR29   | 7.13   | 0.04  | 34.95  | N/D   |
| At3g05860   | WR30   | 6.82   | 0.43  | 37.80  | 0.47  | PR30   | 7.13   | 0.04  | 35.37  | 0.21  |
| At3g66656   | WR31   | 6.82   | 0.43  | 34.84  | N/D   | PR31   | 7.13   | 0.04  | 35.38  | N/D   |
| At4g14530   | WR32   | 6.82   | 0.43  | 34.60  | 1.08  | PR32   | 7.13   | 0.04  | 33.30  | N/D   |
| At4g36590   | WR33   | 8.61   | 0.43  | 36.33  | 0.08  | PR33   | 8.96   | 0.07  | 37.06  | N/D   |
| At5g04640   | WR34   | 6.82   | 0.43  | N/D    | N/D   | PR34   | 7.13   | 0.04  | N/D    | N/D   |
| At5g06500   | WR35   | 6.82   | 0.43  | 37.15  | N/D   | PR35   | 7.13   | 0.04  | N/D    | N/D   |
| At5g26580   | WR36   | 6.82   | 0.43  | 36.88  | 0.29  | PR36   | 7.13   | 0.04  | 35.86  | 0.33  |
| At5g26630   | WR37   | 7.10   | 0.60  | 31.92  | 0.18  | PR37   | 7.13   | 0.33  | 32.38  | 0.68  |
| At5g26650   | WR38   | 7.10   | 0.60  | 37.82  | N/D   | PR38   | 7.13   | 0.33  | N/D    | N/D   |
| At5g26950   | WR39   | 7.10   | 0.60  | 35.39  | 0.17  | PR39   | 7.13   | 0.33  | 34.35  | 0.04  |
| At5g27130   | WR40   | 7.10   | 0.60  | 34.95  | 0.18  | PR40   | 7.13   | 0.33  | 37.37  | 0.78  |
| At5g27960   | WR41   | 7.10   | 0.60  | 35.41  | 0.06  | PR41   | 7.13   | 0.33  | N/D    | N/D   |
| At5g38620   | WR42   | 7.10   | 0.60  | 37.27  | N/D   | PR42   | 7.13   | 0.33  | 36.37  | 0.53  |
| At5g48670   | WR43   | 7.10   | 0.60  | 32.38  | 0.35  | PR43   | 7.13   | 0.33  | 34.54  | 0.30  |
| At5g49420   | WR44   | 7.10   | 0.60  | 35.84  | 0.80  | PR44   | 7.13   | 0.33  | 38.24  | 1.06  |
| At5g49490   | WR45   | 7.10   | 0.60  | 39.63  | 0.26  | PR45   | 7.13   | 0.33  | N/D    | N/D   |
| At5g55690   | WR46   | 7.10   | 0.60  | 34.58  | 0.66  | PR46   | 7.13   | 0.33  | N/D    | N/D   |
| At5g58890   | WR47   | 7.10   | 0.60  | 35.43  | 0.05  | PR47   | 7.13   | 0.33  | 35.50  | N/D   |
| At5g60440   | WR48   | 7.10   | 0.60  | 30.33  | 0.38  | PR48   | 7.13   | 0.33  | 31.65  | 0.47  |

**Table S4.** Critical threshold values for Figure 6A. “AGI Code” provides the AGI number for the analyzed gene. “Average CT” is average critical threshold of three measurements, and “STDEV CT” is the standard deviation associated with the average critical threshold. “Genotype” indicates the type of plant collected, whereas ”Tissue” describes the sample collected. “Growth Conditions” indicates the presence or absence of Dex. 18S was used as a control.

| Gene | AGI code  | Average CT | STDEV CT | Genotype | Tissue          | Growth Conditions |
|------|-----------|------------|----------|----------|-----------------|-------------------|
| 18S  |           | 8.39       | 0.30     | pkl-1    | 21day seedlings | Dex               |
| 18S  |           | 8.02       | 0.02     | pkl-1    | 21day seedlings | no Dex            |
| 18S  |           | 8.05       | 0.02     | PKL::GR  | 21day seedlings | Dex               |
| 18S  |           | 8.05       | 0.01     | PKL::GR  | 21day seedlings | no Dex            |
| PHE1 | At1g65330 | 23.61      | 0.18     | pkl-1    | 21day seedlings | Dex               |
| PHE1 | At1g65330 | 23.41      | 0.03     | pkl-1    | 21day seedlings | no Dex            |
| PHE1 | At1g65330 | 24.79      | 0.24     | PKL::GR  | 21day seedlings | Dex               |
| PHE1 | At1g65330 | 23.11      | 0.08     | PKL::GR  | 21day seedlings | no Dex            |



**Table S5.** Critical threshold values for Figures 6B and 6C. “AGI Code” provides the AGI number for the analyzed gene. “Average CT” is average critical threshold of three measurements, and “STDEV CT” is the standard deviation associated with the average critical threshold. “Genotype” indicates the type of plant collected, whereas “Tissue” describes the sample collected. “Growth Conditions” indicates Dex regimen. 18S was used as a control.

| Gene | AGI code  | Average CT | STDEV CT | Genotype | Tissue             | Growth Conditions                      |
|------|-----------|------------|----------|----------|--------------------|----------------------------------------|
| 18S  |           | 10.09      | 0.22     | pk1-1    | 10.5 day seedlings | 10 days on Dex5 to 0.5 day on Dex5     |
| 18S  |           | 10.08      | 0.01     | pk1-1    | 10.5 day seedlings | 10 days on Dex5 to 0.5 day on no Dex   |
| 18S  |           | 10.13      | 0.01     | pk1-1    | 10.5 day seedlings | 10 days on no Dex to 0.5 day on no Dex |
| 18S  |           | 9.91       | 0.05     | pk1-1    | 10.5 day seedlings | 10 days on no Dex to 0.5 day on Dex5   |
| 18S  |           | 10.39      | 0.18     | pk1-1    | 11 day seedlings   | 10 days on Dex5 to 1 day on Dex5       |
| 18S  |           | 10.04      | 0.05     | pk1-1    | 11 day seedlings   | 10 days on Dex5 to 1 day on no Dex     |
| 18S  |           | 10.29      | 0.09     | pk1-1    | 11 day seedlings   | 10 days on no Dex to 1 day on no Dex   |
| 18S  |           | 10.09      | 0.07     | pk1-1    | 11 day seedlings   | 10 days on no Dex to 1 day on Dex5     |
| 18S  |           | 9.24       | 0.21     | pk1-1    | 13 day seedlings   | 10 days on Dex5 to 3 day on Dex5       |
| 18S  |           | 8.60       | 0.04     | pk1-1    | 13 day seedlings   | 10 days on Dex5 to 3 day on no Dex     |
| 18S  |           | 8.46       | 0.02     | pk1-1    | 13 day seedlings   | 10 days on no Dex to 3 day on no Dex   |
| 18S  |           | 8.73       | 0.04     | pk1-1    | 13 day seedlings   | 10 days on no Dex to 3 day on Dex5     |
| 18S  |           | 10.27      | 0.23     | PKL:GR   | 10.5 day seedlings | 10 days on Dex5 to 0.5 day on Dex5     |
| 18S  |           | 9.87       | 0.01     | PKL:GR   | 10.5 day seedlings | 10 days on Dex5 to 0.5 day on no Dex   |
| 18S  |           | 10.16      | 0.04     | PKL:GR   | 10.5 day seedlings | 10 days on no Dex to 0.5 day on no Dex |
| 18S  |           | 10.34      | 0.15     | PKL:GR   | 10.5 day seedlings | 10 days on no Dex to 0.5 day on Dex5   |
| 18S  |           | 10.21      | 0.23     | PKL:GR   | 11 day seedlings   | 10 days on Dex5 to 1 day on Dex5       |
| 18S  |           | 10.21      | 0.06     | PKL:GR   | 11 day seedlings   | 10 days on Dex5 to 1 day on no Dex     |
| 18S  |           | 10.19      | 0.02     | PKL:GR   | 11 day seedlings   | 10 days on no Dex to 1 day on no Dex   |
| 18S  |           | 10.04      | 0.10     | PKL:GR   | 11 day seedlings   | 10 days on no Dex to 1 day on Dex5     |
| 18S  |           | 8.62       | 0.22     | PKL:GR   | 13 day seedlings   | 10 days on Dex5 to 3 day on Dex5       |
| 18S  |           | 8.88       | 0.07     | PKL:GR   | 13 day seedlings   | 10 days on Dex5 to 3 day on no Dex     |
| 18S  |           | 9.35       | 0.03     | PKL:GR   | 13 day seedlings   | 10 days on no Dex to 3 day on no Dex   |
| 18S  |           | 9.31       | 0.14     | PKL:GR   | 13 day seedlings   | 10 days on no Dex to 3 day on Dex5     |
| PHE1 | At1g65330 | 27.99      | 0.08     | pk1-1    | 10.5 day seedlings | 10 days on Dex5 to 0.5 day on Dex5     |
| PHE1 | At1g65330 | 27.67      | 0.06     | pk1-1    | 10.5 day seedlings | 10 days on Dex5 to 0.5 day on no Dex   |
| PHE1 | At1g65330 | 27.91      | 0.13     | pk1-1    | 10.5 day seedlings | 10 days on no Dex to 0.5 day on no Dex |
| PHE1 | At1g65330 | 28.35      | 0.14     | pk1-1    | 10.5 day seedlings | 10 days on no Dex to 0.5 day on Dex5   |
| PHE1 | At1g65330 | 27.14      | 0.13     | pk1-1    | 11 day seedlings   | 10 days on Dex5 to 1 day on Dex5       |
| PHE1 | At1g65330 | 27.05      | 0.16     | pk1-1    | 11 day seedlings   | 10 days on Dex5 to 1 day on no Dex     |
| PHE1 | At1g65330 | 27.65      | 0.13     | pk1-1    | 11 day seedlings   | 10 days on no Dex to 1 day on no Dex   |
| PHE1 | At1g65330 | 27.80      | 0.18     | pk1-1    | 11 day seedlings   | 10 days on no Dex to 1 day on Dex5     |
| PHE1 | At1g65330 | 25.34      | 0.07     | pk1-1    | 13 day seedlings   | 10 days on Dex5 to 3 day on Dex5       |
| PHE1 | At1g65330 | 25.19      | 0.02     | pk1-1    | 13 day seedlings   | 10 days on Dex5 to 3 day on no Dex     |
| PHE1 | At1g65330 | 25.68      | 0.18     | pk1-1    | 13 day seedlings   | 10 days on no Dex to 3 day on no Dex   |
| PHE1 | At1g65330 | 25.71      | 0.14     | pk1-1    | 13 day seedlings   | 10 days on no Dex to 3 day on Dex5     |
| PHE1 | At1g65330 | 30.61      | 0.17     | PKL:GR   | 10.5 day seedlings | 10 days on Dex5 to 0.5 day on Dex5     |
| PHE1 | At1g65330 | 30.21      | 0.13     | PKL:GR   | 10.5 day seedlings | 10 days on Dex5 to 0.5 day on no Dex   |
| PHE1 | At1g65330 | 28.45      | 0.13     | PKL:GR   | 10.5 day seedlings | 10 days on no Dex to 0.5 day on no Dex |
| PHE1 | At1g65330 | 28.83      | 0.15     | PKL:GR   | 10.5 day seedlings | 10 days on no Dex to 0.5 day on Dex5   |
| PHE1 | At1g65330 | 29.13      | 0.08     | PKL:GR   | 11 day seedlings   | 10 days on Dex5 to 1 day on Dex5       |
| PHE1 | At1g65330 | 28.43      | 0.26     | PKL:GR   | 11 day seedlings   | 10 days on Dex5 to 1 day on no Dex     |
| PHE1 | At1g65330 | 27.16      | 0.06     | PKL:GR   | 11 day seedlings   | 10 days on no Dex to 1 day on no Dex   |
| PHE1 | At1g65330 | 28.59      | 0.12     | PKL:GR   | 11 day seedlings   | 10 days on no Dex to 1 day on Dex5     |
| PHE1 | At1g65330 | 27.09      | 0.06     | PKL:GR   | 13 day seedlings   | 10 days on Dex5 to 3 day on Dex5       |
| PHE1 | At1g65330 | 25.81      | 0.15     | PKL:GR   | 13 day seedlings   | 10 days on Dex5 to 3 day on no Dex     |
| PHE1 | At1g65330 | 26.60      | 0.10     | PKL:GR   | 13 day seedlings   | 10 days on no Dex to 3 day on no Dex   |
| PHE1 | At1g65330 | 28.85      | 0.25     | PKL:GR   | 13 day seedlings   | 10 days on no Dex to 3 day on Dex5     |

**Table S6.** Critical threshold values for Figure 7A. “AGI Code” provides the AGI number for the analyzed gene. “Average CT” is average critical threshold of three measurements, and “STDEV CT” is the standard deviation associated with the average critical threshold. “Genotype” indicates the type of plant collected, whereas “Tissue” describes the sample collected. “Growth Conditions” indicates absence or presence of Dex. 18S was used as a control. Data are presented separately as the samples were analyzed on two separate plates.

| Gene | AGI code  | Average CT | STDEV CT | Genotype | Tissue          | Growth Conditions |
|------|-----------|------------|----------|----------|-----------------|-------------------|
| 18S  |           | 6.52       | 0.19     | pkl-1    | 50% germination | no Dex            |
| 18S  |           | 6.58       | 0.02     | pkl-1    | 50% germination | Dex               |
| 18S  |           | 6.58       | 0.11     | PKL::GR  | 50% germination | no Dex            |
| 18S  |           | 6.59       | 0.07     | PKL::GR  | 50% germination | Dex               |
| LEC1 | At1g21970 | 27.88      | 0.22     | pkl-1    | 50% germination | no Dex            |
| LEC1 | At1g21970 | 28.56      | 0.16     | pkl-1    | 50% germination | Dex               |
| LEC1 | At1g21970 | 28.64      | 0.11     | PKL::GR  | 50% germination | no Dex            |
| LEC1 | At1g21970 | 31.09      | 0.13     | PKL::GR  | 50% germination | Dex               |
| Gene | AGI code  | Average CT | STDEV CT | Genotype | Tissue          | Growth Conditions |
| 18S  |           | 8.05       | 0.04     | pkl-1    | 50% germination | no Dex            |
| 18S  |           | 8.21       | 0.08     | pkl-1    | 50% germination | Dex               |
| 18S  |           | 8.23       | 0.18     | PKL::GR  | 50% germination | no Dex            |
| 18S  |           | 8.70       | 0.23     | PKL::GR  | 50% germination | Dex               |
| PHE1 | At1g65330 | 31.38      | 0.27     | pkl-1    | 50% germination | no Dex            |
| PHE1 | At1g65330 | 31.15      | 0.08     | pkl-1    | 50% germination | Dex               |
| PHE1 | At1g65330 | 32.29      | 0.21     | PKL::GR  | 50% germination | no Dex            |
| PHE1 | At1g65330 | 33.28      | 0.21     | PKL::GR  | 50% germination | Dex               |

**Table S7.** Critical threshold values for Figure 7B. “AGI Code” provides the AGI number for the analyzed gene. “Average CT” is average critical threshold of three measurements, and “STDEV CT” is the standard deviation associated with the average critical threshold. “Genotype” indicates the type of plant collected, whereas “Tissue” describes the sample collected. “Growth Conditions” indicates absence or presence of Dex. 18S was used as a control. Data are presented separately as the samples were analyzed on two separate plates.

| Gene | AGI code  | Average CT | STDEV CT | Genotype | Tissue          | Growth Conditions |
|------|-----------|------------|----------|----------|-----------------|-------------------|
| 18S  |           | 6.56       | 0.04     | pkl-1    | 75% germination | no Dex            |
| 18S  |           | 6.78       | 0.04     | pkl-1    | 75% germination | Dex5              |
| 18S  |           | 6.75       | 0.14     | PKL::GR  | 75% germination | no Dex            |
| 18S  |           | 6.81       | 0.09     | PKL::GR  | 75% germination | Dex5              |
| LEC1 | At1g21970 | 27.38      | 0.11     | pkl-1    | 75% germination | no Dex            |
| LEC1 | At1g21970 | 27.63      | 0.10     | pkl-1    | 75% germination | Dex5              |
| LEC1 | At1g21970 | 29.69      | 0.02     | PKL::GR  | 75% germination | no Dex            |
| LEC1 | At1g21970 | 30.31      | 0.16     | PKL::GR  | 75% germination | Dex5              |
| PHE1 | At1g65330 | 25.25      | 0.05     | pkl-1    | 75% germination | no Dex            |
| PHE1 | At1g65330 | 25.53      | 0.09     | pkl-1    | 75% germination | Dex5              |
| PHE1 | At1g65330 | 28.57      | 0.16     | PKL::GR  | 75% germination | no Dex            |
| PHE1 | At1g65330 | 27.05      | 0.14     | PKL::GR  | 75% germination | Dex5              |
